# Supplementary material for: Audiovisual Crossmodal Correspondence between Bubbles’ Size and Pouring Sounds’ Pitch in Carbonated Beverages
Source: PubMed Central journal article supplement (PMC7466368; doi:10.3390/foods9080966), 2020-07-22
Supplement: foods-09-00966-s001.pdf [file foods-09-00966-s001.pdf]

## Supplementary Materials

### Experiment 2:

**Table S1.** References and volumes of food-coloring used to generate the yellow and brown visual stimuli in Experiment 2

| Color         | Food-Coloring References | Food-Coloring Volume ( $\mu\text{L}$ ) |             |                                                                               |                                                                               |
|---------------|--------------------------|----------------------------------------|-------------|-------------------------------------------------------------------------------|-------------------------------------------------------------------------------|
|               |                          | No Ice Cubes                           | 4 Ice Cubes | No Ice Cubes + Turbidity (cloudy agent: Symrise Ref 357255=10 $\mu\text{L}$ ) | 4 Ice Cubes + Turbidity (cloudy agent: Symrise Ref 357255=6.6 $\mu\text{L}$ ) |
| <b>Yellow</b> | E104                     | 200                                    | 132         | 240                                                                           | 158.4                                                                         |
| <b>Brown</b>  | E150d                    | 50                                     | 33          | 50                                                                            | 33                                                                            |

The final volume in each condition was completed to 200 mL with still water at ambient temperature. The bubbles were subsequently added using Photoshop.

**Table S2.** Pictures of the visual stimuli with small bubbles used in Experiment 2

|                | <b>Colorless</b>                                                                   | <b>Yellow</b>                                                                       | <b>Brown</b>                                                                         |
|----------------|------------------------------------------------------------------------------------|-------------------------------------------------------------------------------------|--------------------------------------------------------------------------------------|
| <b>Width 1</b> |   |    |   |
| <b>Width 2</b> |   |    |   |
| <b>Width 3</b> |   |    |   |
| <b>Width 4</b> |  |  |  |

**Table S3.** Pictures of the visual stimuli with big bubbles used in Experiment 2

|                | <b>Colorless</b>                                                                   | <b>Yellow</b>                                                                       | <b>Brown</b>                                                                         |
|----------------|------------------------------------------------------------------------------------|-------------------------------------------------------------------------------------|--------------------------------------------------------------------------------------|
| <b>Width 1</b> |   |   |   |
| <b>Width 2</b> |   |   |   |
| <b>Width 3</b> |   |   |   |
| <b>Width 4</b> |  |  |  |

**Table S4.** Pictures of the neutral visual stimuli used in Experiment 2

The width of the glass for all neutral visual stimuli corresponded to the width 4.

|                    | Colorless                                                                           | Yellow                                                                               | Brown                                                                                 |
|--------------------|-------------------------------------------------------------------------------------|--------------------------------------------------------------------------------------|---------------------------------------------------------------------------------------|
| No ice cubes       | 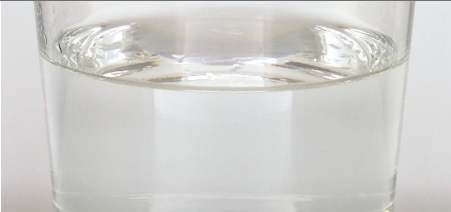   |    |    |
| Turbid             |    |    |    |
| Ice Cubes          |   |   |   |
| Ice Cubes + Turbid |  |  |  |

**Table S5.** Summary of the design for the GNAT blocks used in Experiment 2.

|    |                                          |                            |                            |    |
|----|------------------------------------------|----------------------------|----------------------------|----|
| 1  | Single task (practice)                   | Small bubbles              | Big bubbles                | 24 |
| 2  | Single task (practice)                   | High-pitched               | Low-pitched                | 24 |
| 3  | Single task (practice)                   | Big bubbles                | Small bubbles              | 24 |
| 4  | Single task (practice)                   | Low-pitched                | High-pitched               | 24 |
| 5  | 1 <sup>st</sup> combined task (practice) | Small bubbles+high-pitched | Big bubbles+low-pitched    | 24 |
| 6  | 1 <sup>st</sup> critical combined task   | Small bubbles+high-pitched | Big bubbles+low-pitched    | 72 |
| 7  | 2 <sup>nd</sup> combined task (practice) | Small bubbles+low-pitched  | Big bubbles+high-pitched   | 24 |
| 8  | 2 <sup>nd</sup> critical combined task   | Small bubbles+low-pitched  | Big bubbles+high-pitched   | 72 |
| 9  | 3 <sup>rd</sup> combined task (practice) | Big bubbles+high-pitched   | Small bubbles+low-pitched  | 24 |
| 10 | 3 <sup>rd</sup> critical combined task   | Big bubbles+high-pitched   | Small bubbles+low-pitched  | 72 |
| 11 | 4 <sup>th</sup> combined task (practice) | Big bubbles+low-pitched    | Small bubbles+high-pitched | 24 |
| 12 | 4 <sup>th</sup> critical combined task   | Big bubbles+low-pitched    | Small bubbles+high-pitched | 72 |

### Experiment 3:

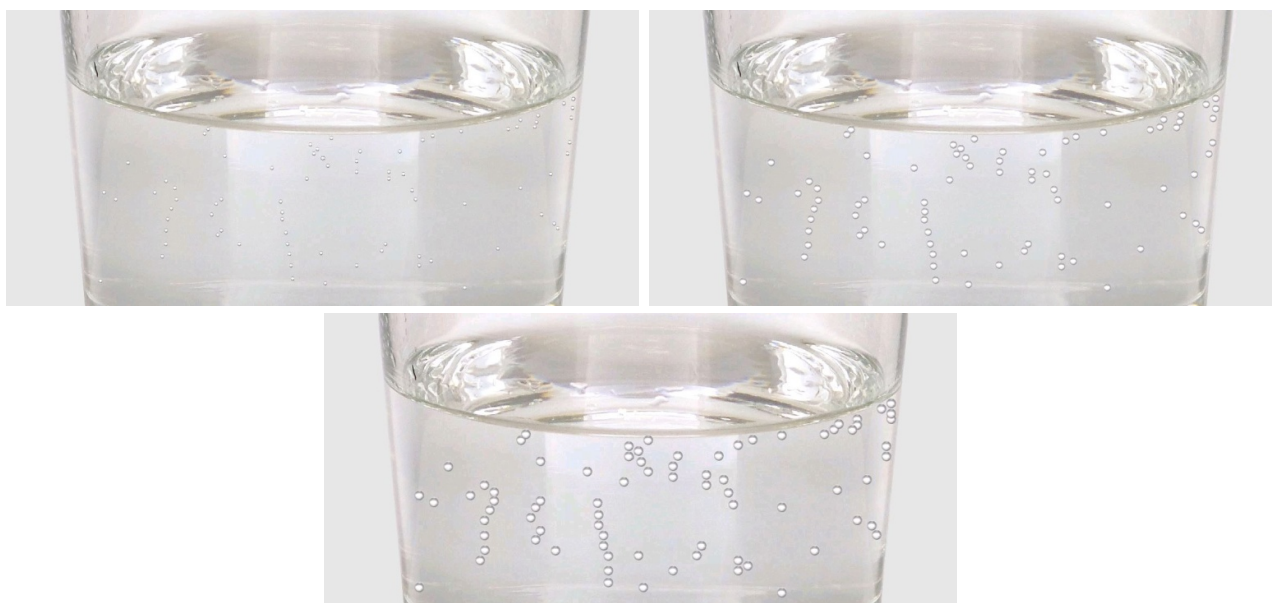

**Figure S1.** Pictures of the three visual stimuli used in Experiments 3a and 3b, with different bubbles' sizes.
